# Supplementary material for: Measurement and PC-SAFT modelling of three-phase behaviour
Source: Royal Society of Chemistry journal article supplement (doi:10.1039/c4cp04336g), 2014-11-24
Supplement: c4cp04336g1.pdf [file c4cp04336g1.pdf]

## **Measuring and PC-SAFT modelling three-phase behaviour**

**Iago Rodríguez-Palmeiro<sup>1</sup>, Oscar Rodríguez<sup>1</sup>, Ana Soto<sup>1†</sup>, Christoph Held<sup>2</sup>**

<sup>1</sup>Department of Chemical Engineering, University of Santiago de Compostela, E-15782,  
Santiago de Compostela (Spain)

<sup>2</sup>Laboratory of Thermodynamics, Department of Biochemical and Chemical  
Engineering, Technische Universität Dortmund, Emil-Figge-Str. 70, D-44227  
Dortmund (Germany)

### **SUPPLEMENTARY MATERIAL**

---

<sup>†</sup> Corresponding author. E-mail: ana.soto@usc.es

**Table S1. Density data ( $\rho$ ) for IL [C<sub>12</sub>mim][NTf<sub>2</sub>] in the temperature range from 283.15 to 348.15 K and atmospheric pressure**

| T/K    | $\rho$ (g·cm <sup>-3</sup> ) |
|--------|------------------------------|
| 288.15 | 1.25268                      |
| 298.15 | 1.24431                      |
| 308.15 | 1.23593                      |
| 318.15 | 1.22757                      |
| 328.15 | 1.21924                      |
| 338.15 | 1.21096                      |
| 348.15 | 1.20273                      |

**Table S2. Absolute relative deviations (ARD) between PC-SAFT calculations (with parameters used in this work) and experimental vapour pressures ( $p^S$ ) and liquid densities ( $\rho^L$ )**

| Compound                                 | ARD*<br>$p^S$ | Data<br>Ref. | ARD*<br>$\rho^L$ | T-range (K) | Data<br>Ref. |
|------------------------------------------|---------------|--------------|------------------|-------------|--------------|
| Water                                    | 1.88          | [1]          | 6.83             | 273-647     | [1]          |
| <i>n</i> -Dodecane                       | 2.10          | [2]          | 0.93             | 263-658     | [3]          |
| [C <sub>10</sub> mim][NTf <sub>2</sub> ] | -             | -            | 1.62             | 293-343     | [4]          |
| [C <sub>12</sub> mim][NTf <sub>2</sub> ] | -             | -            | 1.51             | 293-343     | [This work]  |

$$* \text{ARD} = 100 \cdot \frac{1}{\text{NP}} \sum_{k=1}^{\text{NP}} \left| \left( 1 - \frac{y_k^{\text{PC-SAFT}}}{y_k^{\text{exp}}} \right) \right|$$

### Literature

[1] VCI-Wärmeatlas; VDI-Gesellschaft Verfahrenstechnik und Chemieingenieure (GVC): Düsseldorf, Germany, 1994.

[2] N.B. Vargaftik, Tables of Thermophysical Properties of Liquids and Gases, John Wiley and Sons, New York, 1975

[3] American Petroleum Institute Research Project 44. Selected Values of Properties of Hydrocarbons and Related Compounds. Texas A&M University, College Station, Texas, 1973; Table 23-2-(1.101)-d.

[4] A. Nann, J. Mündges, C. Held, S.P. Verevkin G. Sadowski, J. Phys. Chem. B 117 (2013) 3173-3185.

**Table S3. CAS number, water content ( $\omega_{H_2O}$ ), and experimental and literature values for density ( $\rho$ ), viscosity ( $\eta$ ) and surface tension ( $\gamma$ ) of the pure components at 298.15 K and atmospheric pressure.**

| Compound                                 | CAS number  | $\omega_{H_2O}$<br>(ppm) | $\rho$ (g·cm <sup>-3</sup> ) |                      | $\eta$ (mPa·s) |                     | $\gamma$ (mN·m <sup>-1</sup> ) |                                        |
|------------------------------------------|-------------|--------------------------|------------------------------|----------------------|----------------|---------------------|--------------------------------|----------------------------------------|
|                                          |             | Exp                      | Exp                          | Lit                  | Exp            | Lit                 | Exp                            | Lit                                    |
| Water                                    | 7732-18-5   | ---                      | 0.99704                      | 0.99705 <sup>1</sup> | 0.904          | 0.890 <sup>1</sup>  | 72.0                           | 71.8 <sup>1</sup>                      |
| <i>n</i> -Dodecane                       | 112-40-3    | 74                       | 0.74527                      | 0.74518 <sup>1</sup> | 1.356          | 1.378 <sup>1</sup>  | 24.9                           | 24.9 <sup>1</sup>                      |
| [C <sub>10</sub> mim][NTf <sub>2</sub> ] | 433337-23-6 | 64                       | 1.27800                      | 1.27830 <sup>2</sup> | 119.71         | 119.85 <sup>3</sup> | 31.1                           | 29.5 <sup>3</sup><br>32.2 <sup>2</sup> |
| [C <sub>12</sub> mim][NTf <sub>2</sub> ] | 404001-48-5 | 32                       | 1.24404                      | 1.24470 <sup>2</sup> | 151.42         | 151.37 <sup>3</sup> | 31.2                           | 29.8 <sup>3</sup><br>32.3 <sup>2</sup> |

<sup>a</sup> Standard uncertainty:  $u(P)$  = 5 kPa. For density measurements:  $u(T)$  = 0.01 K,  $u(\rho)$  = 0.00003 g·cm<sup>-3</sup>. For viscosity measurements:  $u(T)$  = 0.01 K,  $u(\eta)$  = 0.5%. For surface tension measurements:  $u(T)$  = 0.05 K,  $u(\gamma)$  = 0.1.

#### Literature

- [1] J.A. Riddick, W.B. Bunger, T.K. Sakano, Organic Solvents. Physical Properties and Methods of Purification, 4th ed., John Wiley and Sons, New York, 1986.
- [2] H.F.D. Almeida, M.G. Freire, A.M. Fernandes, J.A. Lopes da Silva, P. Morgado, K. Shimizu, E.J.M. Filipe, J.N. Canongia Lopes, L.M.N.B.F. Santos, J.A.P. Coutinho. *Langmuir* 30 (2014) 6408-6418.
- [3] C. Kolbeck, J. Lehmann, K. R. J. Lovelock, T. Cremer, N. Paape, P. Wasserscheid, A. P. Fröba, F. Maier, H.P. Steinrück. *J. Phys. Chem. B.* 114 (2010) 17025–17036.

**Table S4. Densities and viscosities of involved phases in water/brine + [C<sub>10</sub>mim][NTf<sub>2</sub>] + *n*-dodecane equilibrium at 298.15 K**

|                                   | Phase  | H <sub>2</sub> O            |                | Brine                       |                |
|-----------------------------------|--------|-----------------------------|----------------|-----------------------------|----------------|
|                                   |        | $\rho$ (g/cm <sup>3</sup> ) | $\eta$ (mPa·s) | $\rho$ (g/cm <sup>3</sup> ) | $\eta$ (mPa·s) |
| Water/brine + ionic liquid        | Upper  | 0.99712                     | 0.893          | 1.02620                     | 0.950          |
|                                   | Lower  | 1.27455                     | 83.93          | 1.27474                     | 90.60          |
| Ionic liquid + <i>n</i> -dodecane | Upper  | 0.74520                     | 1.354          | 0.74520                     | 1.354          |
|                                   | Lower  | 1.24173                     | 95.15          | 1.24173                     | 95.15          |
| Triphasic system                  | Upper  | 0.74517                     | 1.398          | 0.74653                     | 1.394          |
|                                   | Middle | 0.99711                     | 0.894          | 1.02554                     | 0.943          |
|                                   | Lower  | 1.24003                     | 68.93          | 1.24010                     | 69.46          |

Standard uncertainty:  $u(P)$  = 5 kPa. For density measurements:  $u(T)$  = 0.01 K.  $u(\rho)$  = 0.00003 g·cm<sup>-3</sup>. For viscosity measurements:  $u(T)$  = 0.01 K.  $u(\eta)$  = 0.5%.

**Table S5. Densities and viscosities of involved phases in water/brine + [C<sub>10</sub>mim][NTf<sub>2</sub>] + dodecane equilibrium at 348.15 K**

|                                   | Phase  | H <sub>2</sub> O            |                | Brine                       |                |
|-----------------------------------|--------|-----------------------------|----------------|-----------------------------|----------------|
|                                   |        | $\rho$ (g/cm <sup>3</sup> ) | $\eta$ (mPa.s) | $\rho$ (g/cm <sup>3</sup> ) | $\eta$ (mPa.s) |
| Water/brine + ionic liquid        | Upper  | 0.97500                     | 0.381          | 1.00575                     | 0.420          |
|                                   | Lower  | 1.23022                     | 13.37          | 1.20062                     | 15.25          |
| Ionic liquid + <i>n</i> -dodecane | Upper  | 0.70852                     | 0.682          | 0.70852                     | 0.682          |
|                                   | Lower  | 1.19666                     | 14.91          | 1.19666                     | 14.91          |
| Triphasic system                  | Upper  | 0.70846                     | 0.662          | 0.70857                     | 0.662          |
|                                   | Middle | 0.97470                     | 0.381          | 1.00416                     | 0.418          |
|                                   | Lower  | 1.19603                     | 10.68          | 1.18684                     | 12.15          |

Standard uncertainty:  $u(P) = 5$  kPa. For density measurements:  $u(T) = 0.01$  K.  $u(\rho) = 0.00003$  g · cm<sup>-3</sup>.  
For viscosity measurements:  $u(T) = 0.01$  K.  $u(\eta) = 0.5\%$ .

**Table S6. Densities and viscosities of involved phases in water/brine + [C<sub>12</sub>mim][NTf<sub>2</sub>] + dodecane equilibrium at 298.15 K**

|                                   | Phase  | H <sub>2</sub> O            |                | Brine                       |                |
|-----------------------------------|--------|-----------------------------|----------------|-----------------------------|----------------|
|                                   |        | $\rho$ (g/cm <sup>3</sup> ) | $\eta$ (mPa.s) | $\rho$ (g/cm <sup>3</sup> ) | $\eta$ (mPa.s) |
| Water/brine + ionic liquid        | Upper  | 0.99706                     | 0.897          | 1.02696                     | 0.958          |
|                                   | Lower  | 1.24066                     | 109.2          | 1.24088                     | 111.4          |
| Ionic liquid + <i>n</i> -dodecane | Upper  | 0.74536                     | 1.350          | 0.74536                     | 1.350          |
|                                   | Lower  | 1.17744                     | 103.7          | 1.17744                     | 103.7          |
| Triphasic system                  | Upper  | 0.74563                     | 1.348          | 0.74518                     | 1.347          |
|                                   | Middle | 0.99706                     | 0.893          | 1.02617                     | 0.950          |
|                                   | Lower  | 1.17591                     | 79.98          | 1.17606                     | 80.09          |

Standard uncertainty:  $u(P) = 5$  kPa. For density measurements:  $u(T) = 0.01$  K.  $u(\rho) = 0.00003$  g · cm<sup>-3</sup>.  
For viscosity measurements:  $u(T) = 0.01$  K.  $u(\eta) = 0.5\%$ .

**Table S7. Densities and viscosities of involved phases in (water/brine + [C<sub>12</sub>mim][NTf<sub>2</sub>] + dodecane ) equilibrium at 348.15 K**

|                                   | Phase  | H <sub>2</sub> O            |                | Brine                       |                |
|-----------------------------------|--------|-----------------------------|----------------|-----------------------------|----------------|
|                                   |        | $\rho$ (g/cm <sup>3</sup> ) | $\eta$ (mPa.s) | $\rho$ (g/cm <sup>3</sup> ) | $\eta$ (mPa.s) |
| Water/brine + ionic liquid        | Upper  | 0.97490                     | 0.379          | 1.00921                     | 0.425          |
|                                   | Lower  | 1.19508                     | 15.09          | 1.19518                     | 15.64          |
| Ionic liquid + <i>n</i> -dodecane | Upper  | 0.70866                     | 0.662          | 0.70866                     | 0.662          |
|                                   | Lower  | 1.13559                     | 15.33          | 1.13559                     | 15.33          |
| Triphasic system                  | Upper  | 0.70903                     | 0.663          | 0.70854                     | 0.667          |
|                                   | Middle | 0.97174                     | 0.380          | 1.00409                     | 0.417          |
|                                   | Lower  | 1.12766                     | 11.73          | 1.13463                     | 12.31          |

Standard uncertainty:  $u(P) = 5$  kPa. For density measurements:  $u(T) = 0.01$  K.  $u(\rho) = 0.00003$  g · cm<sup>-3</sup>.  
For viscosity measurements:  $u(T) = 0.01$  K.  $u(\eta) = 0.5\%$ .

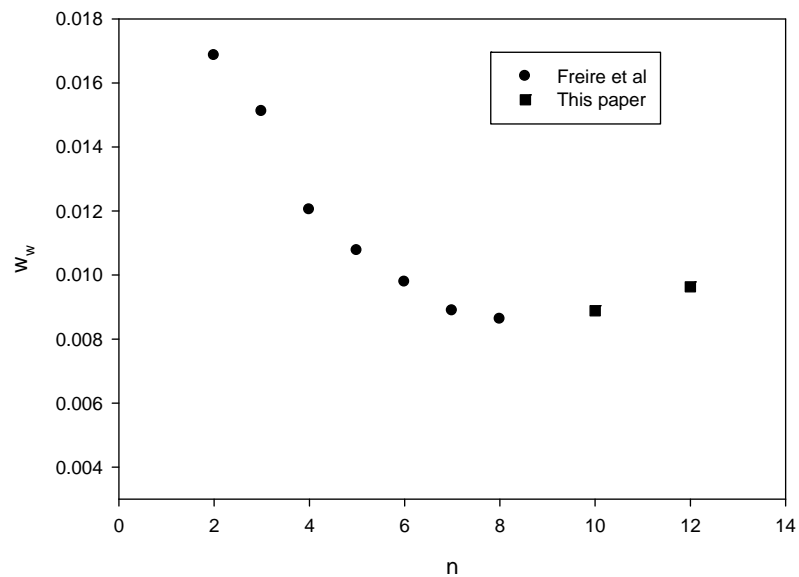

Figure S1. Solubility (mass fraction) of water in  $[C_n\text{mim}][\text{NTf}_2]$  at 298.15 K

#### Literature

M.G. Freire, P.J. Carvalho, R.L. Gardas, I.M. Marrucho, L.M.N.B.F. Santos, J.A. P. Coutinho, *J. Phys. Chem. B* **2008**, *112*, 1604-1610
